# Supplementary material
Source: PubMed Central journal article supplement (PMC4492915)
Supplement: NIHMS638379-supplement-1.pdf [file NIHMS638379-supplement-1.pdf]

| $\Delta$ BRET | Receptor                   |    | G protein       |                   | Agonist  |
|---------------|----------------------------|----|-----------------|-------------------|----------|
|               | <b>hRluc8 (or L1 – L2)</b> |    | <b>Acceptor</b> |                   |          |
| ++            | M1                         |    | $G_{\alpha q}$  |                   | ACh      |
| +             | D1                         |    | $G_{\alpha s}$  |                   | SKF83959 |
| +             | D2S                        |    | $G_{\alpha i}$  |                   | SKF83959 |
| 0             | D1                         |    | $G_{\alpha q}$  |                   | DA       |
| 0             | D1                         |    | $G_{\alpha q}$  |                   | SKF83959 |
| 0             | D5                         |    | $G_{\alpha q}$  |                   | DA       |
| 0             | D5                         |    | $G_{\alpha q}$  |                   | SKF83959 |
| 0             | D2S                        |    | $G_{\alpha q}$  |                   | DA       |
| 0             | D2S                        |    | $G_{\alpha q}$  |                   | SKF83959 |
| 0             | D2L                        |    | $G_{\alpha q}$  |                   | DA       |
| 0             | D2L                        |    | $G_{\alpha q}$  |                   | SKF83959 |
| 0             | D2S                        | D1 | $G_{\alpha q}$  |                   | SKF83959 |
| 0             | D2L                        | D1 | $G_{\alpha q}$  |                   | SKF83959 |
| 0             | D2S                        | D5 | $G_{\alpha q}$  |                   | SKF83959 |
| 0             | D2L                        | D5 | $G_{\alpha q}$  |                   | SKF83959 |
|               |                            |    | <b>hRluc8</b>   | <b>Acceptor</b>   |          |
| ++            | M1                         |    | $G_{\alpha q}$  | GFP10- $\gamma$ 2 | ACh      |
| 0             | D1                         |    | $G_{\alpha q}$  | GFP10- $\gamma$ 2 | DA       |
| 0             | D1                         |    | $G_{\alpha q}$  | GFP10- $\gamma$ 2 | SKF83959 |
| 0             | D5                         |    | $G_{\alpha q}$  | GFP10- $\gamma$ 2 | DA       |
| 0             | D5                         |    | $G_{\alpha q}$  | GFP10- $\gamma$ 2 | SKF83959 |
| 0             | D2S                        |    | $G_{\alpha q}$  | GFP10- $\gamma$ 2 | DA       |
| 0             | D2S                        |    | $G_{\alpha q}$  | GFP10- $\gamma$ 2 | SKF83959 |
| 0             | D2L                        |    | $G_{\alpha q}$  | GFP10- $\gamma$ 2 | DA       |
| 0             | D2L                        |    | $G_{\alpha q}$  | GFP10- $\gamma$ 2 | SKF83959 |
| 0             | D2S                        | D1 | $G_{\alpha q}$  | GFP10- $\gamma$ 2 | DA       |
| 0             | D2S                        | D1 | $G_{\alpha q}$  | GFP10- $\gamma$ 2 | SKF83959 |
| 0             | D2S                        | D5 | $G_{\alpha q}$  | GFP10- $\gamma$ 2 | DA       |
| 0             | D2S                        | D5 | $G_{\alpha q}$  | GFP10- $\gamma$ 2 | SKF83959 |
| 0             | D2L                        | D1 | $G_{\alpha q}$  | GFP10- $\gamma$ 2 | DA       |
| 0             | D2L                        | D1 | $G_{\alpha q}$  | GFP10- $\gamma$ 2 | SKF83959 |
| 0             | D2L                        | D5 | $G_{\alpha q}$  | GFP10- $\gamma$ 2 | DA       |
| 0             | D2L                        | D5 | $G_{\alpha q}$  | GFP10- $\gamma$ 2 | SKF83959 |

**Supplementary Table 1.** No drug induced  $G_{\alpha q}$  coupling in other combinations. All the results with DA or SKF83959 stimulation ( $10^{-11}$  to  $10^{-6}$ ) in D1/D5/D2S/D2L do not show any drug induced BRET change in  $G_{\alpha q}$ -coupling in BRET1 (orange acceptors) and BRET2 (green acceptors) configurations.
